# Supplementary material
Source: PubMed Central journal article supplement (PMC2765220)
Supplement: NIHMS126538-supplement-1.pdf [file NIHMS126538-supplement-1.pdf]

## Online Data Supplement

### Supplemental Methods

#### RNA extraction and quantitative RT-PCR

Primer and probe sequences for these assays are presented in Data Supplement Table I. Standard RNA was made for all assays by the T7 polymerase method (Ambion, Austin, TX) with the use of total RNA isolated from mouse hearts. The correlation between the  $C_t$  (the number of PCR cycles required for the fluorescent signal to reach a detection threshold) and the amount of standard was linear over at least a five-log range of RNA for all assays.  $\beta$ -actin was used as control.

#### Immunoblotting

Western blotting was performed using cardiac tissue lysates. 40  $\mu$ g of total protein extracts were resolved by SDS-PAGE and transferred to polyvinylidene fluoride membranes. Overnight incubation (4°C) were performed with the primary antibodies against acetyl-CoA carboxylase (ACC), phosphorylated ERK(p-ERK), phosphorylated JNK(p-JNK), phosphorylated p38 MAPK(p-p38 MAPK), ERK, JNK, p38 MAPK,  $\beta$ -Actin (Cell Signaling Technology), phosphorlamban (PLN, Upstate USA Inc), phosphorylated phospholamban(p-PLN, Upstate USA Inc), sodium-calcium exchanger protein 1 (NCX1, Abcam), and sarcoplasmic reticulum calcium ATPase (SERCA 2a, kindly provided by Federica del Monte, Harvard Medical School). Protein bands were visualized by chemiluminescent signal using ECL (Cell Signaling Technology) and quantified by densitometry using ImageQuant 5.0 (Molecular Dynamics, Sunnyvale, CA).

## Supplemental Table I

### Primer and probe sequences used in real time quantitative RT-PCR

| Gene          | Primer/Probe | Sequence                                          |
|---------------|--------------|---------------------------------------------------|
| <i>ACC α</i>  | Forward      | 5'-GGCCAGTGCTATGCTGAGAT-3'                        |
|               | Reverse      | 5'-AGGGTCAAGTGCTGCTCCA-3'                         |
|               | Probe        | 5'-FAM-CGTTTGACATAATGGATGCAGCCAGATT-TAMRA-3'      |
| <i>ACC β</i>  | Forward      | 5'-ACTTTGACCTGACCGCTGTG-3'                        |
|               | Reverse      | 5'-CTGAGTGCCGATAATGGC-3'                          |
|               | Probe        | 5'-FAM-TGCATCTTTACCTGGGAGCCGCTAAG-TAMRA-3'        |
| <i>CD36</i>   | Forward      | 5'-ATTGCGACATGATTAATGGCA-3'                       |
|               | Reverse      | 5'-GATGGACCTGCAAATGTCAGA-3'                       |
|               | Probe        | 5'-FAM-AGATGCAGCCTCCTTTCCACCTTTTG-TAMRA-3'        |
| <i>CPT1</i>   | Forward      | 5'-ATCATGTATCGCCGCAAAC-3'                         |
|               | Reverse      | 5'-GGGATGCGTGTAGTGTGAAC-3'                        |
|               | Probe        | 5'-FAM-TCAAGCCGGTCATGGCACTGGG-TAMRA-3'            |
| <i>LCAD</i>   | Forward      | 5'-GGAGTAAGAACGAACGCCAA-3'                        |
|               | Reverse      | 5'-GCCACGACGATCACGAGAT-3'                         |
|               | Probe        | 5'-FAM-CCATTAGTGATGAACACCTTGCTTCCATTGA-TAMRA-3'   |
| <i>MCAD</i>   | Forward      | 5'-TGGCATATGGGTGTACAGGG-3'                        |
|               | Reverse      | 5'-CCAAATACTTCTTCTTCTGTTGATCA-3'                  |
|               | Probe        | 5'-FAM-AGGCATTTGCCCAAAGAATTTGCTTC-TAMRA-3'        |
| <i>Mte1</i>   | Forward      | 5'-TGGGAACACCATCTCCTACAA-3'                       |
|               | Reverse      | 5'-CCACGACATCCAAGAGACCA-3'                        |
|               | Probe        | 5'-FAM-AGACTATACCCCTGTGTCCCTTGTGAGAA-TAMRA-3'     |
| <i>PDK4</i>   | Forward      | 5'-TTCACACCTTCAACACATGC-3'                        |
|               | Reverse      | 5'-AAAGGGCGGTTTTCTTGATG-3'                        |
|               | Probe        | 5'-FAM-CGTGGCCCTCATGGCATTCTTG-TAMRA-3'            |
| <i>PPAR α</i> | Forward      | 5'-CAAGGCCTCAGGGTACCACT-3'                        |
|               | Reverse      | 5'-TTGCAGCTCCGATCACACTT-3'                        |
|               | Probe        | 5'-FAM-AGGCTGTAAGGGCTTCTTTTCGGC-TAMRA-3'          |
| <i>PPAR δ</i> | Forward      | 5'-AGAGGAAGTGGCCATGGGT-3'                         |
|               | Reverse      | 5'-CATCACAGCCCATCTGCAG-3'                         |
|               | Probe        | 5'-FAM-CTGGGAGAGGTCTGCACAGCTGCT-TAMRA-3'          |
| <i>RXR α</i>  | Forward      | 5'-ACAGGAACAGCGCTCACAGT-3'                        |
|               | Reverse      | 5'-CACGCATCTTCGACACCAG-3'                         |
|               | Probe        | 5'-FAM-CGTTAGCACCCCTGTCAAAGATGGCG-TAMRA-3'        |
| <i>SCOT</i>   | Forward      | 5'-AAGCCATCACGGGAGATTTT-3'                        |
|               | Reverse      | 5'-CCACGGTAGTTCCTGCAGC-3'                         |
|               | Probe        | 5'-FAM-CACATTGGCAAATTGAAGTTTCTTGCACCTTTT-TAMRA-3' |
| <i>UCP3</i>   | Forward      | 5'-TGCTGAGATGGTGACCTACGA-3'                       |
|               | Reverse      | 5'-CCAAAGGCAGAGACAAAGTGA-3'                       |
|               | Probe        | 5'-FAM-AAGTTGTCAGTAAACAGGTGAGACTCCAGCAA-TAMRA-3'  |

## Supplemental Table II

### General Characteristics of the Mice

|                | LFWT (n=7) | HFWT (n=9) | LFTG (n=9) | HFTG (n=8) |
|----------------|------------|------------|------------|------------|
| HW/BW, mg/g    | 4.07±0.15  | 3.85±0.26  | 4.29±0.15  | 3.96±0.08  |
| HW/TL, mg/mm   | 7.53±0.54  | 7.95±0.26  | 8.67±0.60  | 8.73±0.45  |
| Lung, wet/dry  | 4.04±0.12  | 4.07±0.08  | 4.11±0.07  | 4.13±0.07  |
| Liver, wet/dry | 3.00±0.04  | 2.92±0.07  | 2.91±0.03  | 2.92±0.04  |

Values are expressed as mean ± SEM. HW/BW, heart weight normalized to body weight; HW/TL, heart weight normalized to tibia length.

## Supplemental figures

Figure I

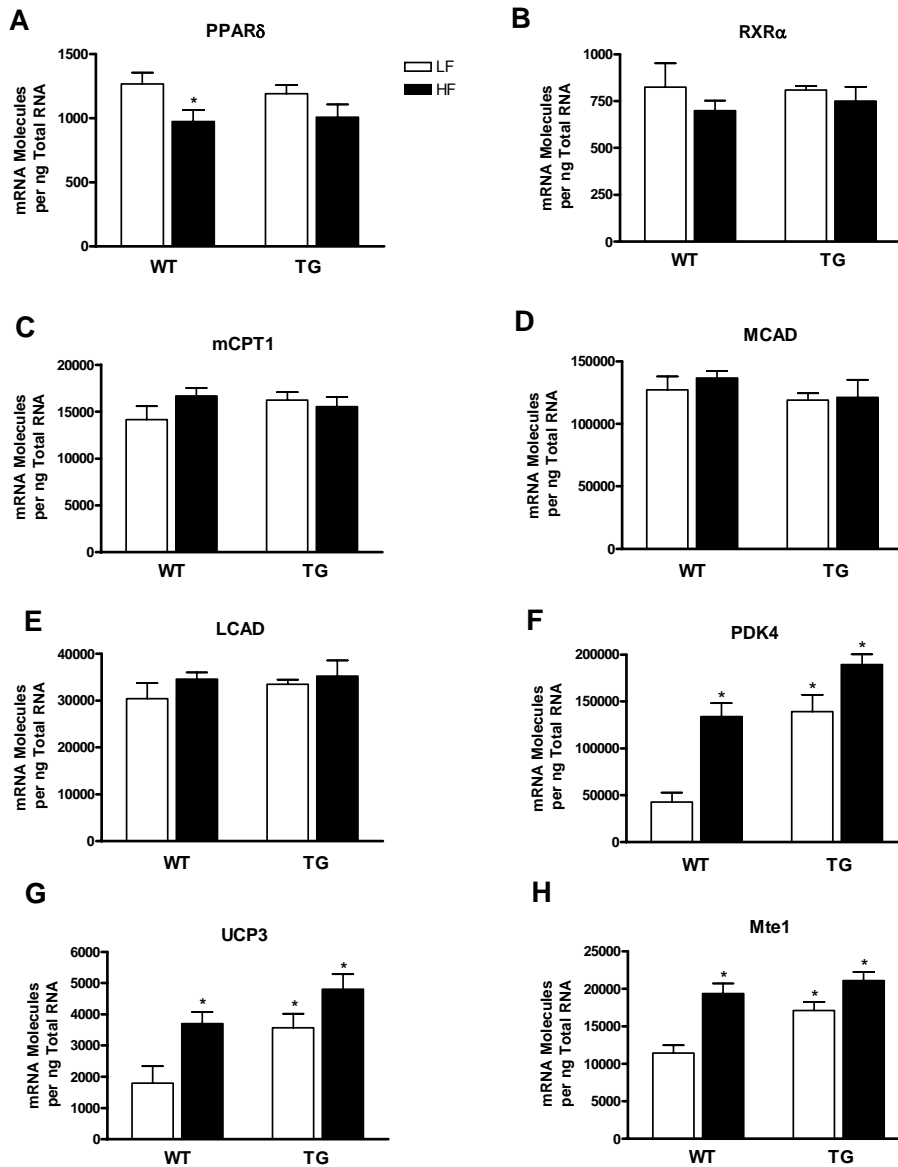

**Figure I.** Expression of PPAR  $\delta$ , RXR $\alpha$  and PPAR  $\alpha$  target genes determined by real-time PCR. (A and B) Expression of PPAR  $\delta$  and RXR $\alpha$ , (C-H) Expression of mCPT1, MCAD, LCAD, PDK4, UCP3 and Mte1 in the hearts of WT and TG mice fed a HF or LF diet for 20 weeks. Data are mean  $\pm$  SEM (n=6 per group). \*p < 0.05 vs LFWT.

**Figure II**

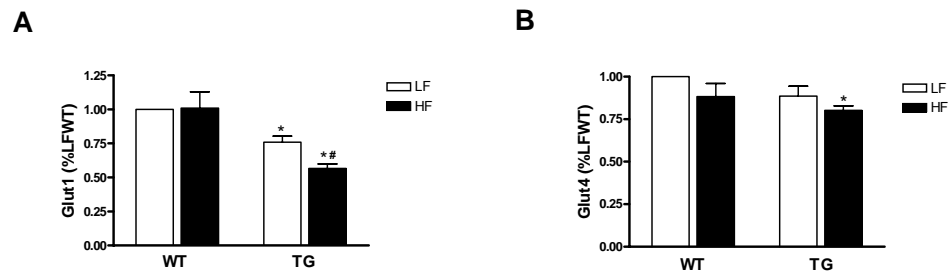

**Figure II.** mRNA expression levels of Glut1 and Glut4 in the hearts of WT and TG mice fed a HF or LF diet for 20 weeks. Data are mean  $\pm$  SEM (n=3 per group). \*p < 0.05 vs LFWT; #p < 0.05 vs LFTG.

**Figure III**

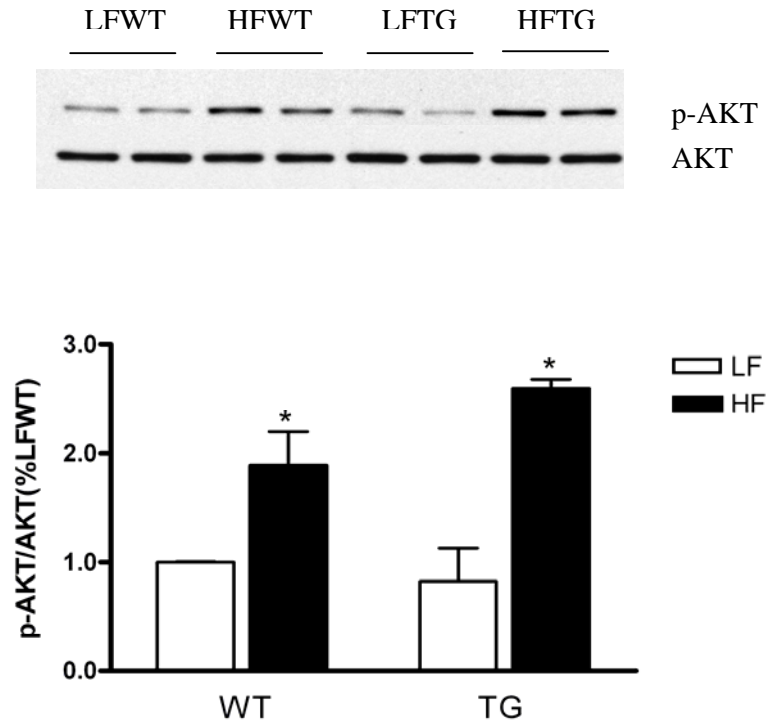

**Figure III.** Protein levels of phosphorylated AKT and total AKT in the hearts of WT and TG fed a HF or LF diet for 20 weeks. Data are expressed as mean  $\pm$  SEM from 4-5 hearts for each group. \* $p < 0.05$  vs LFWT.
